# Supplementary material for: Three-dimensional hierarchical conductive metal–organic frameworks/NiFe layered double hydroxide/carbon nanofibers: an efficient oxygen evolution reaction catalyst for Zn–air batteries
Source: Royal Society of Chemistry journal article supplement (doi:10.1039/d2qi01190e), 2022-01-01
Supplement: d2qi01190e1.pdf [file d2qi01190e1.pdf]

# **Three-dimensional hierarchical conductive metal-organic frameworks/NiFe layered double hydroxide/carbon nanofibers: An efficient oxygen evolution reaction catalyst for Zn-air batteries**

Jiajia Li,<sup>a</sup> Yunong Qin,<sup>a</sup> Yu Lei,<sup>a</sup> Shifeng Li,<sup>a</sup> Ling Li,<sup>\*a</sup> Bo Ouyang,<sup>\*b</sup> Erjun Kan<sup>b</sup>  
and Wenming Zhang<sup>\*a</sup>

<sup>a</sup> *National-Local Joint Engineering Laboratory of New Energy Photoelectric Devices, College of Physics Science and Technology, Hebei University, Baoding, Hebei 071002, China.*

<sup>b</sup> *MIIT Key Laboratory of Semiconductor Microstructure and Quantum Sensing, Nanjing University of Science and Technology, Nanjing 210094, China.*

## **Corresponding author:**

E-mail: lilinghbu@163.com (L. Li), ouyangboyi@njust.edu.cn (B. Ouyang),  
wmzhanghbu@126.com (W. Zhang)

## Supplementary Figures and Tables

### List of Contents

#### 1. Supplementary Figs:

**Fig. S1** Preparation and Characterization of Catalysts. a) electrospun sheet, b) carbonized electrospun sheet, c) the sheet after the first hydrothermal reaction and d) the sheet after the second hydrothermal reaction.

**Fig. S2** Electron microscopy measurements. (a-d) SEM images of the pure Co-CAT, Co-CAT/CNFs, pure NiFe-LDH and Co-CAT/NiFe-LDH.

**Fig. S3** (a) XPS spectrum of the Co-CAT/NiFe-LDH/CNFs. (b) N<sub>2</sub> adsorption/desorption isotherms of samples. (c) Pore diameter distribution image of Co-CAT/NiFe-LDH/CNFs and NiFe-LDH/CNFs.

**Fig. S4** (a) XPS Ni 2p spectra, (b) XPS Fe 2p spectra and (c) XPS Co 2p spectra of Co-CAT/NiFe-LDH/CNFs, NiFe-LDH/CNFs and Co-CAT/CNFs.

**Fig. S5** (a) XPS Co 2p spectra, (b) XPS Ni 2p spectra and (c) XPS Fe 2p spectra of Co-CAT, Co-CAT/CNFs, NiFe-LDH and NiFe-LDH/CNFs.

**Fig. S6** Multi-current process chronopotentiometric curve of the Co-CAT/NiFe-LDH/CNFs.

**Fig. S7** ORR performance of the as-prepared products in 0.1 M KOH solution.

**Fig. S8** Top view and side view of the initial structure (I) and the structures after adsorption of OH\* (II), O\* (III), and OOH\* (IV) of NiFe-LDH/CNFs, respectively.

**Fig. S9** Simplified diagram showing the OER mechanism on the Co-CAT/NiFe-LDH/CNFs electrocatalyst.

**Fig. S10** Round-trip efficiency for the 1st, 50th and 100th cycles.

## **2. Supplementary Tables:**

**Table S1** The detailed determination of cobalt, nickel, iron, oxide and carbon calculated by means of ICP-MS and EA methods for the Co-CAT/NiFeLDH/CNFs.

**Table S2** Comparisons of the OER activity of non-precious metal based electrocatalysts.

**Table S3** Power density of Zn-air battery based on non-precious metal based electrocatalysts in alkaline environment.

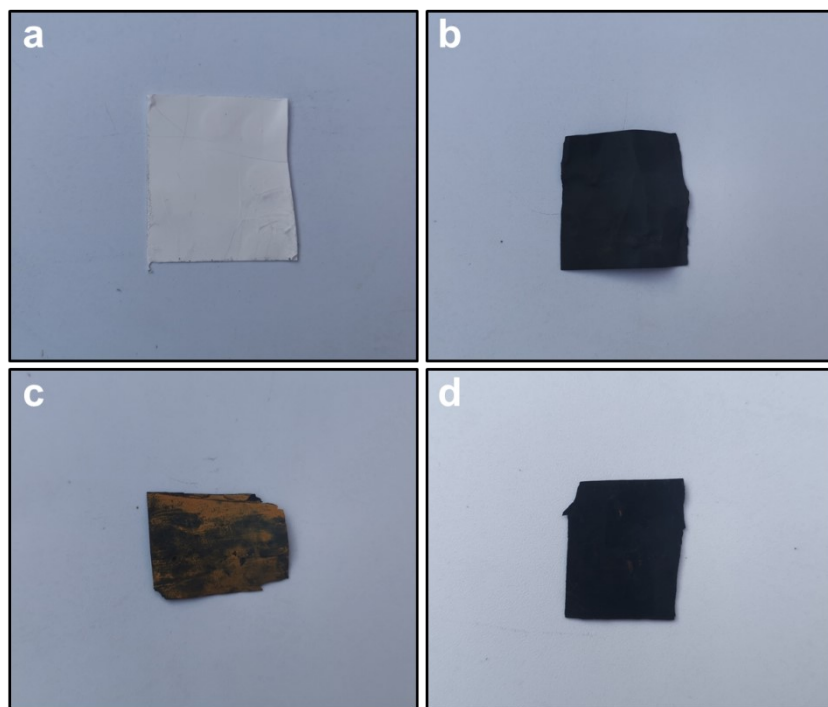

**Fig. S1** Preparation and Characterization of Catalysts. a) electrospun sheet, b) carbonized electrospun sheet, c) the sheet after the first hydrothermal reaction and d) the sheet after the second hydrothermal reaction.

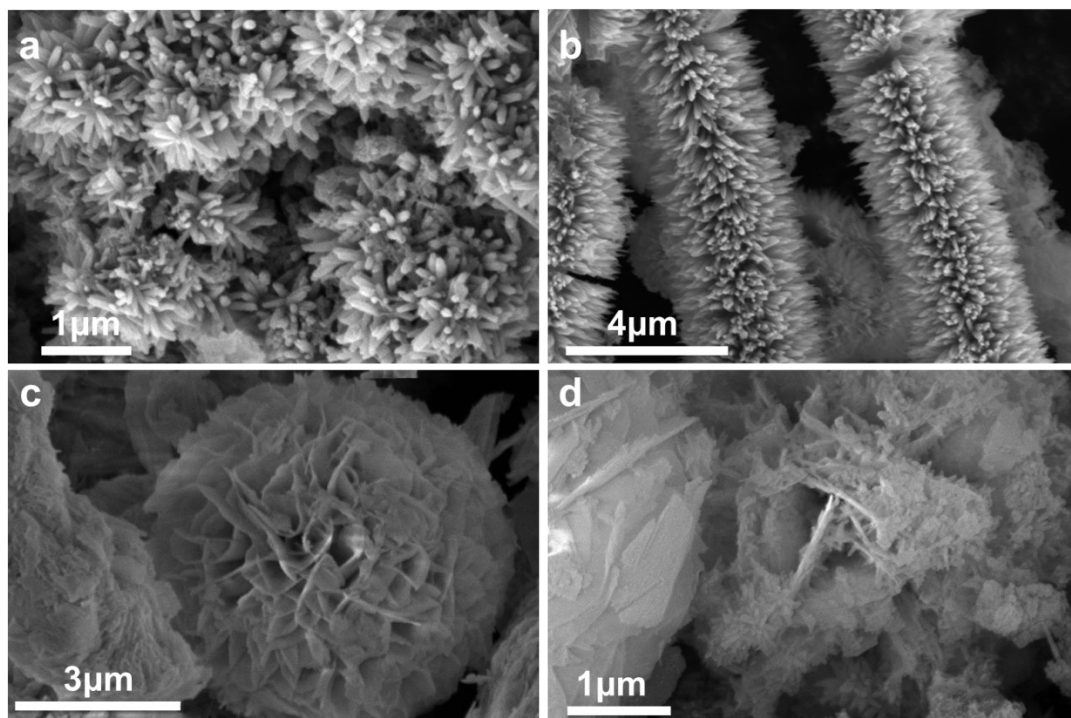

**Fig. S2** Electron microscopy measurements. (a-d) SEM images of the pure Co-CAT, Co-CAT/CNFs, pure NiFe-LDH and Co-CAT/NiFe-LDH.

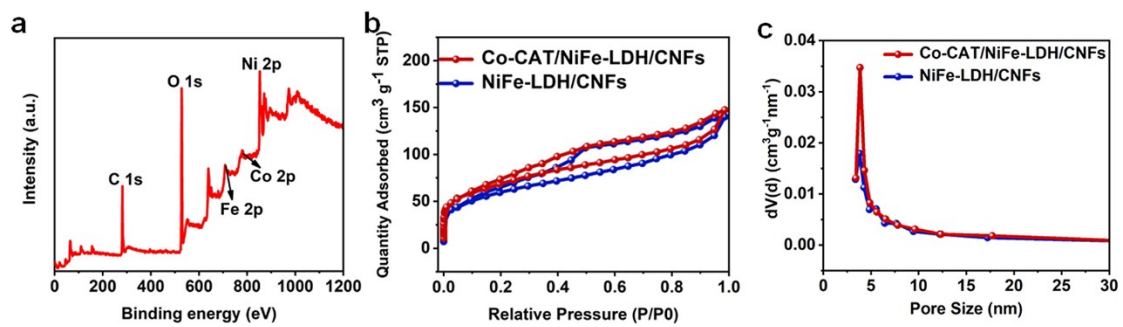

**Fig. S3** (a) XPS spectrum of the Co-CAT/NiFe-LDH/CNFs. (b) N<sub>2</sub> adsorption/desorption isotherms of samples. (c) Pore diameter distribution image of Co-CAT/NiFe-LDH/CNFs and NiFe-LDH/CNFs.

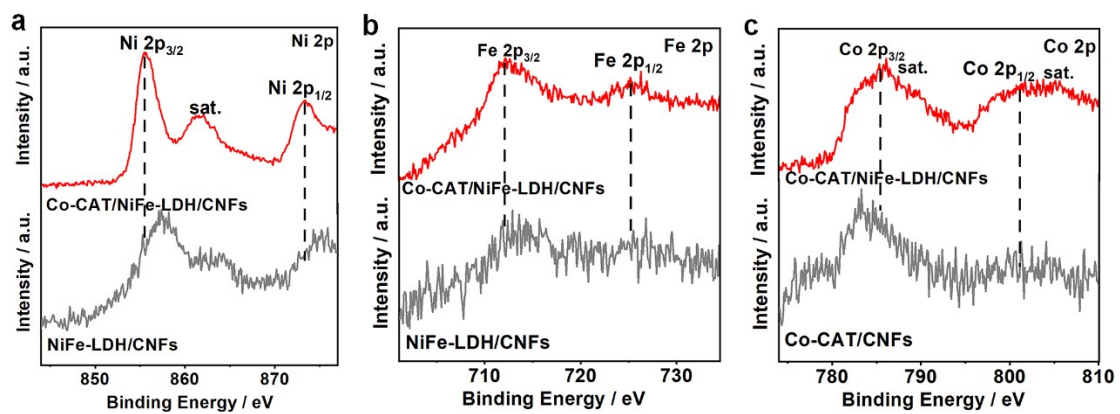

**Fig. S4** (a) XPS Ni 2p spectra, (b) XPS Fe 2p spectra and (c) XPS Co 2p spectra of Co-CAT/NiFe-LDH/CNFs, NiFe-LDH/CNFs and Co-CAT/CNFs.

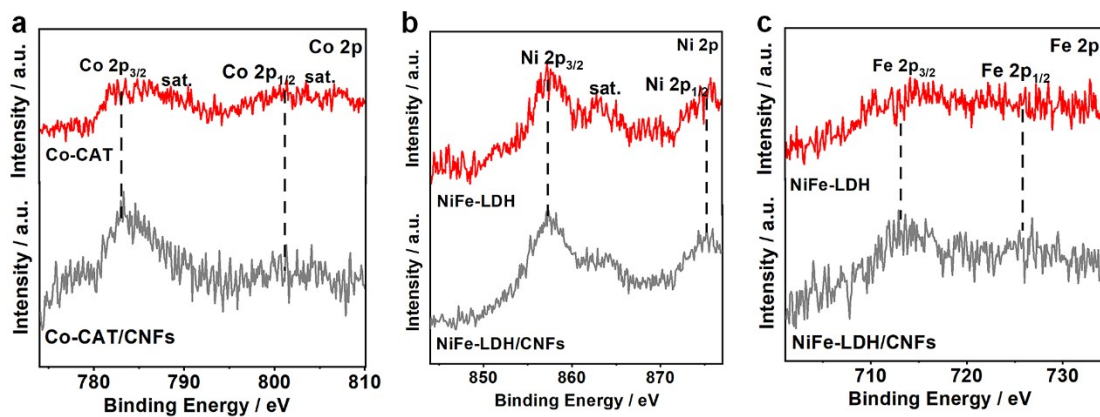

**Fig. S5** (a) XPS Co 2p spectra, (b) XPS Ni 2p spectra and (c) XPS Fe 2p spectra of Co-CAT, Co-CAT/CNFs, NiFe-LDH and NiFe-LDH/CNFs.



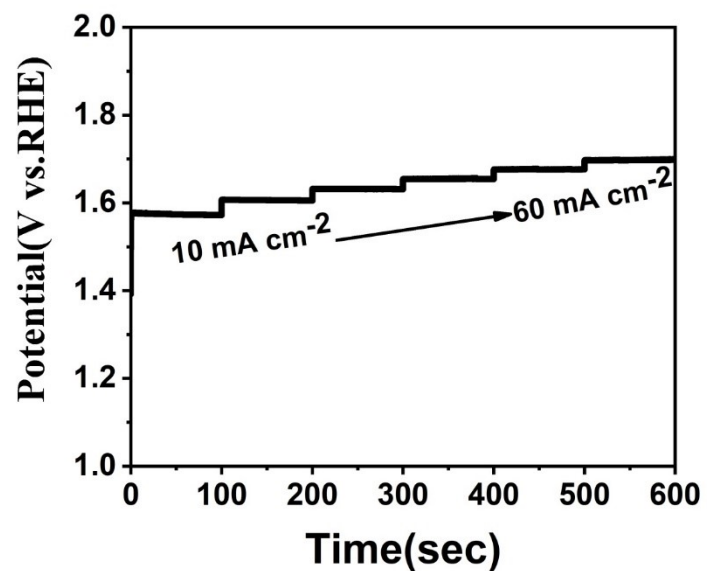

**Fig. S6** Multi-current process chronopotentiometric curve of the Co-CAT/NiFe-LDH/CNFs.

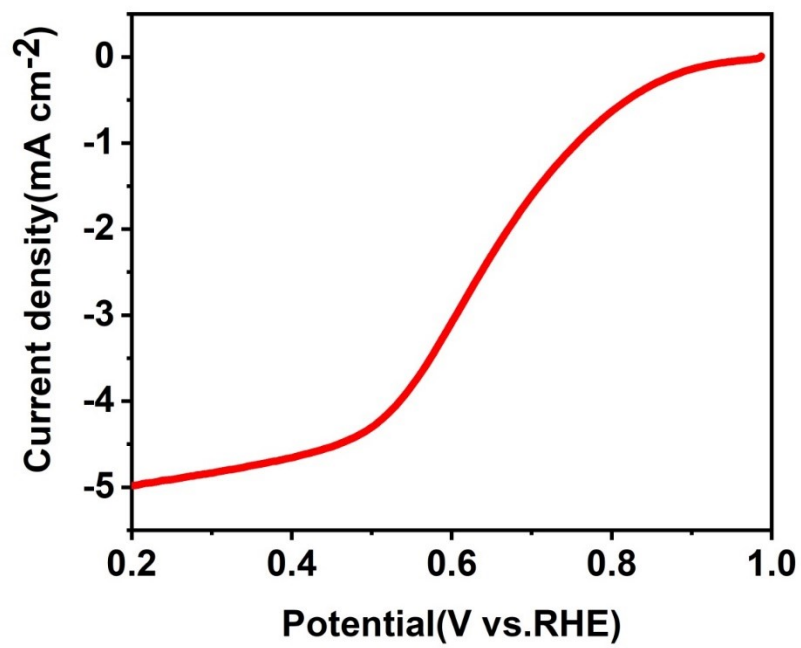

**Fig. S7** ORR performance of the as-prepared products in 0.1 M KOH solution.

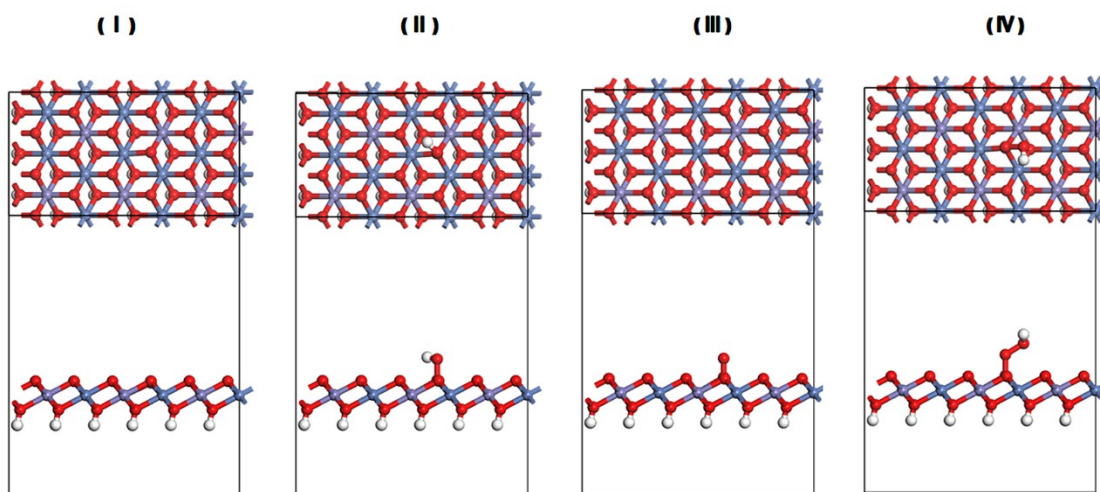

**Fig. S8** Top view and side view of the initial structure (I) and the structures after adsorption of OH\* (II), O\* (III), and OOH\* (IV) of NiFe-LDH/CNFs, respectively.

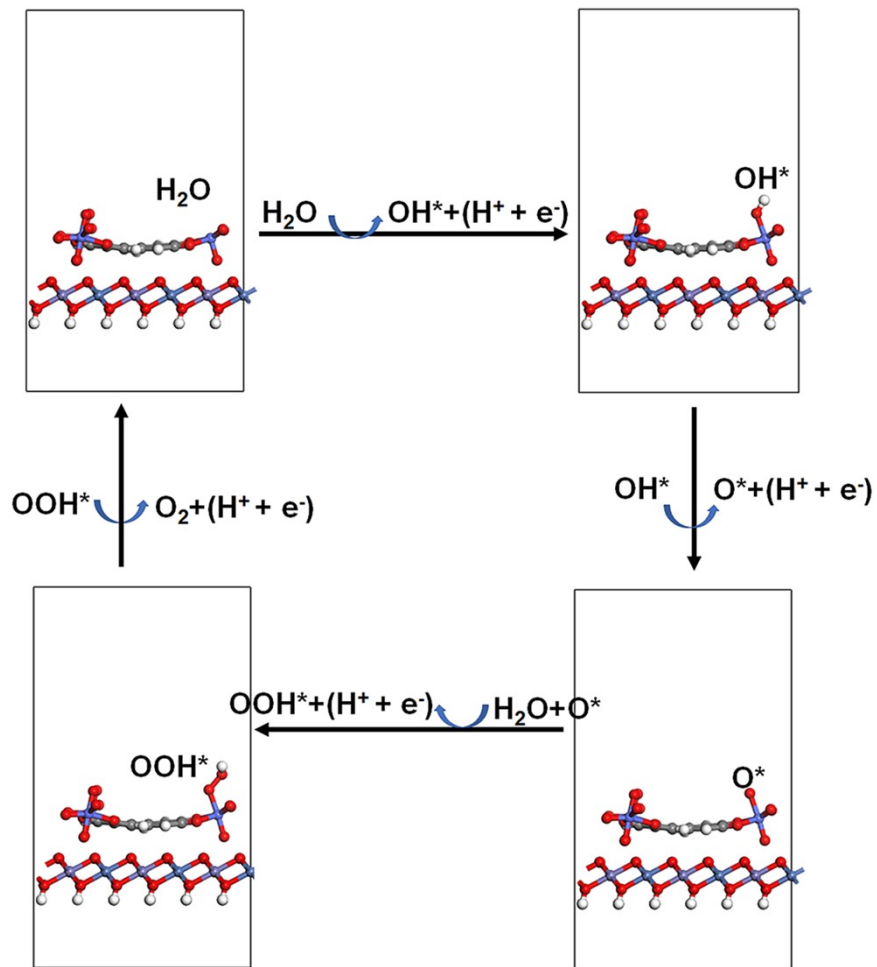

**Fig. S9** Simplified diagram showing the OER mechanism on the Co-CAT/NiFe-LDH/CNFs electrocatalyst.

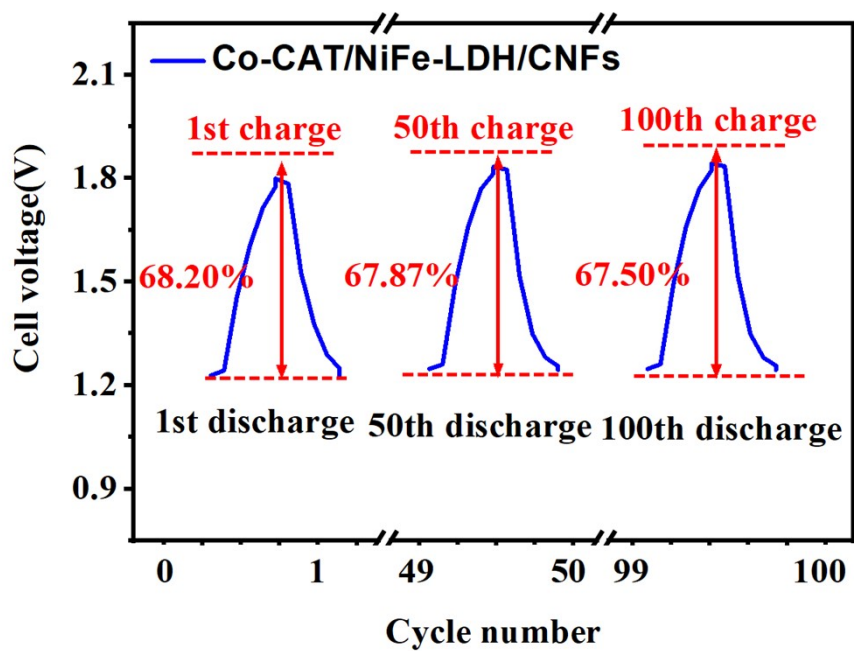

Fig. S10 Round-trip efficiency for the 1st, 50th and 100th cycles.

**Table S1** The detailed determination of cobalt, nickel, iron, oxide and carbon calculated by means of ICP-MS and EA methods for the Co-CAT/NiFeLDH/CNFs.

| Methods | Sample weight (mg) | Co (g/kg) | Ni (g/kg) | Fe(g/kg) | C (%)  | O (%)  |
|---------|--------------------|-----------|-----------|----------|--------|--------|
| ICP-MS  | 0.0127             | 15.662    | 286.647   | 91.151   | -      | -      |
| EA      | 1.956              | -         | -         | -        | 42.125 | -      |
|         | 1.765              | -         | -         | -        | -      | 14.547 |

**Table S2** Comparisons of the OER activity of non-precious metal based electrocatalysts.

| Catalyst                                               | Eleetrolyte  | $\eta$ at<br>J=10<br>mA<br>cm <sup>-2</sup><br>(mV) | Tafel<br>slope<br>(mV<br>dec <sup>-1</sup> ) | Substrate    | scan<br>rate<br>(mV·s <sup>-1</sup> ) | Ref.      |
|--------------------------------------------------------|--------------|-----------------------------------------------------|----------------------------------------------|--------------|---------------------------------------|-----------|
| Co-CAT/NiFe-LDH/CNFs                                   | 1.0 M<br>KOH | 330                                                 | 85                                           | RDE          | 10                                    | This work |
| NiFe-LDH/CNFs                                          | 1.0 M<br>KOH | 420                                                 | 121                                          | RDE          | 10                                    | This work |
| Co-CAT/CNFs                                            | 1.0 M<br>KOH | 450                                                 | 123                                          | RDE          | 10                                    | This work |
| RuO <sub>2</sub>                                       | 1.0 M<br>KOH | 320                                                 | 91                                           | RDE          | 10                                    | This work |
| Pt/C                                                   | 1.0 M<br>KOH | 580                                                 | 89                                           | RDE          | 10                                    | This work |
| MCN-LDH                                                | 0.1 M<br>KOH | 440                                                 | 140                                          | RDE          | 10                                    | S1[1]     |
| Mn-CoN                                                 | 0.1M<br>KOH  | 390                                                 | 57.5                                         | RDE          | 5                                     | S2[2]     |
| Co-NC@LDH                                              | 0.1 M<br>KOH | 389                                                 | 79.65                                        | GC           | 5                                     | S3[3]     |
| Au-NWs/Ni <sub>6</sub> MnO <sub>8</sub>                | 0.1 M<br>KOH | 360                                                 | 62                                           | RDE          | 5                                     | S4[4]     |
| Ti <sub>3</sub> C <sub>2</sub> T <sub>x</sub> -CoBDC   | 0.1M<br>KOH  | 410                                                 | 48.2                                         | GC           | 1                                     | S5[5]     |
| Co-CoOx/N-C                                            | 1.0 M<br>KOH | 420                                                 | 71.5                                         | Carbon cloth | 5                                     | S6[6]     |
| NiFe-LDH/Co <sub>3</sub> N-CNF                         | 0.1M<br>KOH  | 312                                                 | 60                                           | GC           | 10                                    | S7[7]     |
| Ni <sub>3</sub> Fe-Co <sub>9</sub> S <sub>8</sub> /rGO | 0.1 M<br>KOH | 390                                                 | 109.8                                        | -            | 5                                     | S8[8]     |
| SNCF-NR                                                | 0.1M<br>KOH  | 390                                                 | 61                                           | RDE          | 5                                     | S9[9]     |
| W <sub>1</sub> Co <sub>3</sub> S@HCF                   | 1.0 M<br>KOH | 437                                                 | 99                                           | GCE          | 5                                     | S10[10]   |
| FeCo/FeCoNi@NCNTs-HF                                   | 0.1M<br>KOH  | 378                                                 | 57                                           | GC           | 5                                     | S11[11]   |

**Table S3** Power density of Zn-air battery based on non-precious metal based electrocatalysts in alkaline environment.

| Catalysts                               | Electrolyte                                             | Active area (cm <sup>2</sup> )/mass loading (mg cm <sup>-2</sup> ) | Power density of ZAB (mW cm <sup>-2</sup> ) | Power density of solid-state ZAB (mW cm <sup>-2</sup> ) | Ref.      |
|-----------------------------------------|---------------------------------------------------------|--------------------------------------------------------------------|---------------------------------------------|---------------------------------------------------------|-----------|
| Co-CAT/NiFe-LDH/CNFs                    | 6.0 M KOH                                               | 1                                                                  | 327.09                                      | 112.04                                                  | This work |
| NiFe-LDH/CNFs                           | 6.0 M KOH                                               | 1                                                                  | 49.97                                       | 65.2                                                    | This work |
| Pt/C                                    | 6.0 M KOH                                               | 1                                                                  | 101.92                                      | 71.41                                                   | This work |
| MCN-LDH                                 | 6.0 M KOH and 0.2 M ZnCl <sub>2</sub>                   | 3 mg cm <sup>-2</sup>                                              | -                                           | -                                                       | S1        |
| Mn-CoN                                  | 6.0 M KOH+0.2 M Zn(Ac) <sub>2</sub>                     | 1                                                                  | 53                                          | -                                                       | S2        |
| Co-NC@LDH                               | 6.0 M KOH + 0.2 M Zn(Ac) <sub>2</sub>                   | 3 mg cm <sup>-2</sup>                                              | 107.8                                       | -                                                       | S3        |
| Au-NWs/Ni <sub>6</sub> MnO <sub>8</sub> | 6.0 M KOH + 0.20 M ZnCl <sub>2</sub>                    | -                                                                  | 121                                         | -                                                       | S4        |
| Ti <sub>3</sub> C <sub>2</sub> Tx-CoBDC | 6 M KOH + 0.2 M Zn(Ac) <sub>2</sub> ·2 H <sub>2</sub> O | ~2.5 mg cm <sup>-2</sup>                                           | -                                           | -                                                       | S5        |
| Co-CoOx/N-C                             | PVA gel                                                 | -                                                                  | -                                           | 20.7                                                    | S6        |
| NiFe-LDH/Co,N-CNF                       | 6 M KOH and 0.2 M                                       | 1 mg cm <sup>-2</sup>                                              | -                                           | -                                                       | S7        |



|                                                        |                                                            |                         |        |   |     |
|--------------------------------------------------------|------------------------------------------------------------|-------------------------|--------|---|-----|
| Ni <sub>3</sub> Fe-Co <sub>9</sub> S <sub>8</sub> /rGO | zinc<br>acetate<br>0.2 M<br>ZnCl <sub>2</sub> + 6<br>M KOH | 10 mg cm <sup>-2</sup>  | 125    | - | S8  |
| FeCo/FeCoNi@NCNTs<br>-HF                               | 6 M KOH<br>+ 0.2 M<br>Zn(ac) <sub>2</sub>                  | 2.0 mg cm <sup>-2</sup> | 156.22 | - | S11 |

---

## References

- [1] Y. Qian, T. An, E. Sarnello, Z. Liu, T. Li and D. Zhao, Janus electrocatalysts containing MOF-derived carbon networks and NiFe-LDH nanoplates for rechargeable zinc-air batteries, *ACS Appl. Energy Mater.*, 2019, **2**, 1784-1792.
- [2] Y. Zhang, B. Ouyang, G. Long, H. Tan, Z. Wang, Z. Zhang, W. Gao, R. Rawat and H. Fan, Enhancing bifunctionality of CoN nanowires by Mn doping for long-lasting Zn-air batteries, *Sci. China. Chem.*, 2020, **63**, 890-896.
- [3] D. Chen, X. Chen, Z. Cui, G. Li, B. Han, Q. Zhang, J. Sui, H. Dong, J. Yu, L. Yu and L. Dong, Dual-active-site hierarchical architecture containing NiFe-LDH and ZIF-derived carbon-based framework composite as efficient bifunctional oxygen electrocatalysts for durable rechargeable Zn-air batteries, *Chem. Eng. J.*, 2020, **399**, 125718.
- [4] G. Fu, X. Jiang, Y. Chen, L. Xu, D. Sun, J.-M. Lee and Y. Tang, Robust bifunctional oxygen electrocatalyst with a “rigid and flexible” structure for air-cathodes, *NPG Asia Mater.*, 2018, **10**, 618-629.
- [5] H. Cheng, M. Li, C. Su, N. Li and Z. Liu, Cu-Co bimetallic oxide quantum dot decorated nitrogen-doped carbon nanotubes: A high-efficiency bifunctional oxygen electrode for Zn-air batteries, *Adv. Funct. Mater.*, 2017, **27**, 1701833.
- [6] S. Li, W. Xie, Y. Song and M. Shao, Layered double hydroxide@polydopamine core-shell nanosheet arrays-derived bifunctional electrocatalyst for efficient, flexible,

- all-solid-state zinc-air battery, *ACS Sustain. Chem. Eng.*, 2019, **8**, 452-459.
- [7] Q. Wang, L. Shang, R. Shi, X. Zhang, Y. Zhao, G. Waterhouse, L. Wu, C. Tung and T. Zhang, NiFe layered double hydroxide nanoparticles on Co,N-codoped carbon nanoframes as efficient bifunctional catalysts for rechargeable zinc-air batteries, *Adv. Energy Mater.*, 2017, **7**, 1700467.
- [8] X. Hu, T. Huang, Y. Tang, G. Fu and J. Lee, Three-dimensional graphene-supported Ni<sub>3</sub>Fe/Co<sub>9</sub>S<sub>8</sub> composites: rational design and active for oxygen reversible electrocatalysis, *ACS Appl. Mater. Interfaces*, 2019, **11**, 4028-4036.
- [9] Y. Zhu, W. Zhou, Y. Zhong, Y. Bu, X. Chen, Q. Zhong, M. Liu and Z. Shao, A perovskite nanorod as bifunctional electrocatalyst for overall water splitting, *Adv. Energy Mater.*, 2017, **7**, 1602122.
- [10] T. Zhou, W. Xu, N. Zhang, Z. Du, C. Zhong, W. Yan, H. Ju, W. Chu, H. Jiang and C. Wu, Ultrathin cobalt oxide layers as electrocatalysts for high-performance flexible Zn-Air batteries, *Adv. Mater.*, 2019, **31**, 1807468.
- [11] Z. Wang, J. Ang, B. Zhang, Y. Zhang, X. Ma, T. Yan, J. Liu, B. Che, Y. Huang and X. Lu, FeCo/FeCoNi/N-doped carbon nanotubes grafted polyhedron-derived hybrid fibers as bifunctional oxygen electrocatalysts for durable rechargeable zinc-air battery, *Appl. Catal. B*, 2019, **254**, 26-36.
